# Supplementary material for: Disentangling Consumers’ CSR Knowledge Types and Effects
Source: MDPI journal article supplement (doi:10.3390/su141911946), 2022-09-22
Supplement: s1 [file s1]

## Training Examples – Our Evaluations – Compare these with your evaluations.

### Environment policy score

|             |   |   |   |
|-------------|---|---|---|
| Participant | 1 | 2 | 3 |
| Score       | 2 |   | 3 |

### Environment Global Evaluation

|             |   |   |    |
|-------------|---|---|----|
| Participant | 1 | 2 | 3  |
| Score       | 1 |   | -1 |

### Supplier Policy Score

|             |   |   |   |
|-------------|---|---|---|
| Participant | 1 | 2 | 3 |
| Score       |   |   |   |

### Supplier Global Evaluation Score

|             |   |   |   |
|-------------|---|---|---|
| Participant | 1 | 2 | 3 |
| Score       | 1 |   |   |

### Explanations:

Participant 1: They score 2 points for environment policy, as they correctly identified 1 policy (the offset policy). The rest of the discussion is generic. For the global evaluation, they question the motives of the company, but not strongly, and they do acknowledge real action. For this, we score a 1 on the global evaluation, but this is a judgement call. For the supplier policy score, they reveal no knowledge, but they do nevertheless provide a positive global evaluation which we score as 1. This is again arguable, and judgement call.

Participant 2: The answer offers no relevant content so nothing is entered in the scoring sheet.

Participant 3: Although they have a very negative view of this company, they do know that they are doing carbon offsets and also have an ethical policy. In the case of carbon neutral, they score 2 as they clearly have knowledge of the policy. They also mention that they have a policy on global warming, but do not know they are signatory to the Global Warming Action Plan. This then gets a further score of 1, as they have some knowledge of their policy. This gives them a total score of 3 on the environment policy. For the supplier's policy, they make no mention of this, so this is left blank. For the global evaluation of the environment policy, even though they are knowledgeable about the policy, their evaluation is negative. For the global evaluation of suppliers, there is no mention of this, so the field is left blank.

**Important:** If you provided a different evaluation to us, and have a reason for the difference in evaluation, do not worry. The point of this process is for you to make your own independent evaluation. As long as you are reasonably consistent in your scoring, you are doing the task well.
