# Supplementary material for: Disentangling Consumers’ CSR Knowledge Types and Effects
Source: MDPI journal article supplement (doi:10.3390/su141911946), 2022-09-22
Supplement: s1 [file s1]

**Training Document using Fictional Examples: Please score the 3 participants:**

**Environment Policy:**

1. To be carbon neutral
2. To make minimal impact on the environment

**Environment Action:**

1. Signatory to the Global Warming Action plan
2. Carbon offsets by tree planting in rainforests

**Supplier Policy:**

1. To select and source suppliers who offer ethical treatment of employees

**Supplier Actions:**

1. Independent audit of all suppliers to ensure compliance with minimum employment standards
2. All paper sourced with Trade Fair accredited suppliers

Participant 1: They are not a bad company for ethics, I think. They do a lot of good work, but I wonder whether they are just using their ethical policy to sell us more of their junk. At least they are working on offsetting their carbon emissions. I don't know much about their suppliers, but I guess they would at least be better than most on making sure their suppliers are ethical.

Participant 2: They make shoes I believe.

Participant 3: They are pretty dodgy, I have heard. They claim all this ethical stuff, but it is all a smokescreen. They are a bad company. They claim they are carbon neutral due to offsets, but I read that this is a lie to help them pretend they are taking action on global warming. They have also been found to use child labour, so now claim they are doing ethical policies.

**Environment policy score**

|             |   |   |   |
|-------------|---|---|---|
| Participant | 1 | 2 | 3 |
| Score       |   |   |   |

**Environment Global Evaluation**

|             |   |   |   |
|-------------|---|---|---|
| Participant | 1 | 2 | 3 |
| Score       |   |   |   |

**Supplier Policy Score**

|             |   |   |   |
|-------------|---|---|---|
| Participant | 1 | 2 | 3 |
| Score       |   |   |   |

**Supplier Global Evaluation Score**

|             |   |   |   |
|-------------|---|---|---|
| Participant | 1 | 2 | 3 |
| Score       |   |   |   |
