# Supplementary material for: Disentangling Consumers’ CSR Knowledge Types and Effects
Source: MDPI journal article supplement (doi:10.3390/su141911946), 2022-09-22
Supplement: s1 [file s1]

[https://masseyuni-my.sharepoint.com/:f/g/personal/mavis\\_massey\\_ac\\_nz/Em5J72xVUm5HnK7YjhHGwhoBL5HFwIKUTcN4Zl3oNM6nPA?e=bZWt2f](https://masseyuni-my.sharepoint.com/:f/g/personal/mavis_massey_ac_nz/Em5J72xVUm5HnK7YjhHGwhoBL5HFwIKUTcN4Zl3oNM6nPA?e=bZWt2f)
