# Supplementary material for: Disentangling Consumers’ CSR Knowledge Types and Effects
Source: MDPI journal article supplement (doi:10.3390/su141911946), 2022-09-22
Supplement: s1 [file s1]

Archive with 7 entries (7 files):
- CSR_data analysis.xlsx
- Full Link for Materials.pdf
- Scoring Method Description.pdf
- Scoring System Guide for Judges_revised.pptx
- Training Document using Fictional Examples.pdf
- Training Document using Fictional Examples_Our Answers.pdf
- Training Example.xlsx
