# Supplementary material for: Disentangling Consumers’ CSR Knowledge Types and Effects
Source: MDPI journal article supplement (doi:10.3390/su141911946), 2022-09-22
Supplement: s1 [file s1 › CSR_data analysis.xlsx]

## Sheet: Merged
			Legend:	Scoring against knowledge			Global evaluation
	Scorer 1
	Apple						BAT												BP								Cussons												Dole				Dominos						Kellogs
ID	Environment	Environment	Employment	Employment	Suppliers	Suppliers	Environment	Environment	Employment	Employment	Community	Community	Suppliers	Suppliers	Smoking prevention	Smoking Prevention	Marketing	Marketing	Environment	Environment	Employment	Employment	Community	Community	Suppliers	Suppliers	Environment	Environment	Employment	Employment	Community	Community	Suppliers	Suppliers	Safety	Safety	Animal Ethics	Animal Ethics	Environment	Environment	Community	Community	Environment	Environment	Suppliers	Suppliers	Food Ethics	Food Ethics	Environment
1
2																				-1
3																																								-1
4		1
5				-1															1	-1		-1																				-1						-1
6						-1													2					1																1
7						-1																																		-1		-1
8
9						-1														-1																										-1
10
11																				-1
12
13
14																			1	1
15
16				1
17																																										-1
18
19
20																								-1																				1				-1
21
22				1															1	1
23
24				-1		-1														-1			1																	-1		-1		-1				1
25						-1														-1																						1						-1
26																																																1
27				-1		-1														-1																											2	1
28
29				-1		-1
30																			1	1
31		-1		-1		-1														-1																												-1
32																				-1
33				1															1	1																											1	1
34
35		-1		-1		-1														-1																								-1				-1
36																																																-1
37																				-1				-1																								-1
38				1		-1														-1
39						-1
40				1
41
42												-1				-1
43																				-1																				-1
44
45																			2	1
46				1																				-1
47																																											2
48						-1
49																				1			1	1			1
50
51
52		-1				-1														-1																						-1						-1
53																																										-1
54																				-1
55																																																1
56
57				1																																								1
58	1	1
59				-1		-1													1	-1
60																																												-1
61																							2																				2
62																								-1																								-1
63						-1
64						-1
65
66
67																			1	1			2
68
69		1				1														1				1															1	1				1			1	1
70	1	1				-1																																								-1		-1
71				1		1														1						1																					2	1	1
72
73
74
75
76				1															1	1																							2				2	1
77		1		1																-1				-1
78	2	1
79
80																				-1																												-1
81
82																																										1
83
84																				-1																							2	1				1
85
86																																																1
87
88						-1													2	1																												-1
89																			1	-1				-1		-1		-1
90
91		-1		1		-1														-1					2	1														-1		-1	1	-1
92				1																-1				1																-1		-1					1	-1
93
94
95								-1				-1								-1																				-1		-1						-1
96																				-1						-1																						1
97
98																				-1				-1																-1		-1						1
99
100
101																																																1
102
103
104
105		-1																		-1				1																								-1
106
107		1																		-1				-1																		1		-1
108
109
110
111
112	1	1				-1													1	1			1	1																		-1
113		1																																						1
114	2	1																																														-1
115				1
116																							1	1																			2	1			1	1
117																							2	1																			2
118						-1														-1																						-1		-1
119				1
120
121
122		-1																		1				-1																		-1					1	1
123		1																																						1		1						-1
124	1	1
125
126
127																			1	1
128																			1																												1	1
129
130
131					1	-1														1
132																				-1
133				-1																																						-1
134																																																-1
135
136																				-1
137				-1
138
139						-1													1	-1																						1
140																								-1
141																				-1																												-1
142																				-1
143
144	1	1																					1	1																				-1
145
146				1		1
147
148
149
150	1	1		-1																-1				-1
151						-1														-1																												-1
152		1
153
154
155																																																-1
156						-1														-1																								-1				-1
157
158																				-1							2	1	1	1																	1	-1
159		-1		-1		-1														-1																						-1						1
160																				1
161																																											2	1
162																							1	1																			2	1
163																				-1				-1
164																																																-1
165																																																1
166
167
168		1				1																		1																								1
169																																																1
170																								1
171
172
173
174																			1
175						-1														-1
176
177
178				-1																-1
179
180				1																-1			1	-1
181																				1
182
183
184
185						-1														-1																												-1
186																			1	-1																						-1
187
188						-1													1	1			1	1																-1
189
190
191
192
193												-1								-1
194																				-1																												-1
195																				-1				-1																								-1
196
197		-1		-1		-1														-1				-1		-1														-1
198																				-1
199
200
201
202
203																				-1			1	1
204
205
206				-1																-1				-1
207				-1																-1
208																																											1	1
209																																																-1
210																				-1
211																				-1																						1						-1
212
213
214
215																																																1
216						-1														-1			1	-1																-1		-1
ID	Environment	Environment	Employment	Employment	Suppliers	Suppliers	Environment	Environment	Employment	Employment	Community	Community	Suppliers	Suppliers	Smoking prevention	Smoking Prevention	Marketing	Marketing	Environment	Environment	Employment	Employment	Community	Community	Suppliers	Suppliers	Environment	Environment	Employment	Employment	Community	Community	Suppliers	Suppliers	Safety	Safety	Animal Ethics	Animal Ethics	Environment	Environment	Community	Community	Environment	Environment	Suppliers	Suppliers	Food Ethics	Food Ethics	Environment
sum	10	8	0	1	1	-27	0	-1	0	0	0	-3	0	0	0	-1	0	0	22	-37	0	-1	16	-3	2	-1	3	0	1	1	0	0	0	0	0	0	0	0	1	-7	0	-11	18	0	0	-2	13	-8	1
total sum/#scorers	16.1667	1.83333	6.83333	-5.16667	3.83333	-15.5	0	-0.5	0	-0.166667	0	-1.66667	0	-0.166667	0	-1.66667	0	-0.833333	17.8333	-24	0	-0.666667	10.5	4.5	3.5	-0.166667	2.33333	0.5	1.33333	1	0	0	0.166667	0	0	0	0.333333	0	4.83333	-6.83333	3.5	-10.8333	11.6667	0.166667	0.166667	-0.5	7.16667	-7	3.66667
mean
[truncated: 598 more columns]

## Sheet: Results
9 CSR policies identified in total							Company	Number of policies				Number of all policies across companies				50
13 Companies							Apple	3
							BAT	6
Respondents' knowledge about companies' policy towards environment							BP	4				Respondents' knowledge about policies (individuals)
	Knowledge	Global					Cussons	6					Frequency	%			Frequency	%
Apple	16.2	1.8					Dole	2				Very low (0-3)	142	65.7407		No knowledge	41	19
BAT	0	-0.5					Dominos	3				Low (3.1-6)	47	21.7593
BP	17.8	-24					Kellogs	4				Moderate (6.1-9)	21	9.72222
Cussons	2.3	0.5					LG	4				High (over 9)	6	2.77778
Dole	4.8	-6.8					McDonalds	5				Total	216	100
Dominos	11.7	0.2					Toyota	1
Kellogs	3.7	2.3					Unilever	5				Finding: Respondents have very low knowledge regarding CSR policies. Almost 88% has a very low or low knowledge (coded 0-6) with 19% having no knowledge at all (note that if respondents did not correctly identify the brand's parent company, their knowledge was not tested).
LG	5.7	0.5					Westpac	4
McDonalds	21.3	2.7					Z	3
Toyota	18.2	8.8										Respondents' global evaluation (individuals)
Unilever	0.3	-1					Average knowledge about policies-total sample						Frequency	%
Westpac	5.5	4.5					Policy	Knowledge				Negative (below 0)	60	27.7778
Z	14.5	5.7					Food ethics	25.6				Neutral (0)	36	16.6667
sum knowledge/#companies	9.38462	-5.3					Community	24.2				Positive (over 0)	120	55.5556
							Environment	9.4				Total	216	100
							Suppliers	5.5
Respondents' knowledge about companies' policy towards employment							Employment	5.3
	Knowledge	Global					Animal ethics	0.3
Apple	6.8	-5.2					Smoking prevention	0
BAT	0	-0.2					Marketing	0
BP	0	-0.7					Safety	0
Cussons	1.3	1
Kellogs	1.5	-0.7
LG	2.3	0.3					In our study, we had 4 house of brands. These were BAT (Benson&Hedges brand), Toyota (Lexus brand) and Unilever (Rexona brand) and Penord Ricard (Absolut).
McDonalds	31.8	5.8
Unilever	0	0					Respondents who correcly identified the brand's parent company
Westpac	4.3	5					Company	Frequency	%
Z	5.2	7.2					BAT	10	4.6
sum knowledge/#companies	5.32	12.5					Toyota	71	32.9
							Unilever	25	11.6
							Penord Ricard	0	0
Respondents' knowledge about companies' policy towards suppliers
	Knowledge	Global					Knowledge
Apple	3.8	-15.5						Environment	Employment	Suppliers	Community	Food ethics	Animal ethics	Smoking prevention	Marketing	Safety	Total
BAT	0	-0.2					Apple	16.2	6.8	3.8	-	-	-	-	-	-	26.8
BP	3.5	-0.2					BAT	0	0	0	0	-	-	0	0	-	0
Cussons	0.2	0					BP	17.8	0	3.5	10.5	-	-	-	-	-	31.8
Dominos	0.2	-0.5					Cussons	2.3	1.3	0.2	0	-	0.3	-	-	0	4.1
LG	1.2	0.7					Dole	4.8	-	-	3.5	-	-	-	-	-	8.3
McDonalds	40.2	13.5					Dominos	11.7	-	0.2	-	7.2	-	-	-	-	19.1
Unilever	0	0					Kellogg’s	3.7	1.5	-	8.3	28.2	-	-	-	-	41.7
Westpac	0.2	0					LG	5.7	2.3	1.2	2	-	-	-	-	-	11.2
sum knowledge/#companies	5.47778	-2.2					McDonalds	21.3	31.8	40.2	85.5	67	-	-	-	-	245.8
							Toyota	18.2	-	-	-	-	-	-	-	-	18.2
							Unilever	0.3	0	0	0	0	-	-	-	-	0.3
Respondents' knowledge about companies' policy towards community							Westpac	5.5	4.3	0.2	62.3	-	-	-	-	-	72.3
	Knowledge	Global					Z	14.5	5.2	-	70.3	-	-	-	-	-	90
BAT	0	-1.7					Total (sum of policies / # companies	9.4	5.3	5.5	24.2	25.6	0.3	0	0	0	70.3
BP	10.5	4.5
Cussons	0	0
Dole	3.5	-10.8					Global evaluation
Kellogs	8.3	4.5						Environment	Employment	Suppliers	Community	Food ethics	Animal ethics	Smoking prevention	Marketing	Safety	Total
LG	2	1.3					Apple	1.8	-5.2	-15.5	-	-	-	-	-	-	-18.9
McDonalds	85.5	35.2					BAT	-0.5	-0.2	-0.2	-1.7	-	-	-1.7	-0.8	-	-5.1
Unilever	0	0					BP	-24	-0.7	-0.2	4.5	-	-	-	-	-	-20.4
Westpac	62.3	28.2					Cussons	0.5	1	0	0	-	0	-	-	0	1.5
Z	70.3	37					Dole	-6.8	-	-	-10.8	-	-	-	-	-	-17.6
sum knowledge/#companies	24.24	98.2					Dominos	0.2	-	-0.5	-	-7	-	-	-	-	-7.3
							Kellogg’s	2.3	-0.7	-	4.5	3.5	-	-	-	-	9.6
							LG	0.5	0.3	0.7	1.3	-	-	-	-	-	2.8
Respondents' knowledge about companies' policy towards smoking prevention							McDonalds	2.7	5.8	13.5	35.2	-8.5	-	-	-	-	48.7
	Knowledge	Global					Toyota	8.8	-	-	-	-	-	-	-	-	8.8
BAT	0	-1.7					Unilever	-1	0	0	0	0	-	-	-	-	-1
							Westpac	4.5	5	0	28.2	-	-	-	-	-	37.7
							Z	5.7	7.2	-	37	-	-	-	-	-	49.9
Respondents' knowledge about companies' policy towards marketing
	Knowledge	Global
BAT	0	-0.8
								Total score for all policies	# policies	Potential max score for company (# policies x 2)	Potential max score for all participants (potential score for a company x n)	Score of policy knowledge (total score for a company / potential max score for all participants) - %
							McDonalds	245.8	35	70	15120	1.62566
Respondents' knowledge about companies' policy towards safety							Z	90	18	36	7776	1.15741
	Knowledge	Global					Westpac	72.3	20	40	8640	0.836806
Cussons	0	0					Kellogg’s	41.7	15	30	6480	0.643519
							Toyota	18.2	14	28	6048	0.300926
							Dominos	19.1	15	30	6480	0.294753
Respondents' knowledge about companies' policy towards animal ethics							BP	31.8	29	58	12528	0.253831
	Knowledge	Global					Apple	26.8	28	56	12096	0.221561
Cussons	0.3	0					Dole	8.3	35	70	15120	0.0548942
							LG	11.2	61	122	26352	0.0425015
							Cussons	4.1	40	80	17280	0.0237269
Respondents' knowledge about companies' policy towards food ethics							Unilever	0.3	45	90	19440	0.00154321
	Knowledge	Global					BAT	0	39	78	16848	0
Dominos	7.2	-7
Kellogs	28.2	3.3					Global evaluations against number of policies
McDonalds	67	-8.5						Global evaluation	# of policies/actions
Unilever	0	0					Toyota	8.8	14
sum knowledge/#companies	25.6	-12.2					Dominos	-7.3	15
							Kellogg’s	9.6	15
							Z	49.9	18
Companies' global evaluation - average (sum global/#policies)							Westpac	37.7	20
Company	Global evaluation						Apple	-18.9	28
Z	16.6333						BP	-20.4	29
McDonalds	9.74						Dole	-17.6	35
Westpac	9.425						McDonalds	48.7	35
Toyota	8.8						BAT	-5.1	39
Kellogs	2.35						Cussons	1.5	40
LG	0.7						Unilever	-1	45
Cussons	0.25						LG	2.8	61
Unilever	-0.2
BAT	-0.85
Dominos	-2.43333						Global evaluations against number of policy categories
BP	-5.1							Global evaluations	# of policy categories
Apple	-6.3						Toyota	8.8	1
Dole	-8.8						Dole	-17.6	2
							Dominos	-7.3	3
							Z	49.9	3
							Apple	-18.9	3
							Kellogg’s	9.6	4
							Westpac	37.7	4
							BP	-20.4	4
							LG	2.8	4
							McDonalds	48.7	5
							Unilever	-1	5
							BAT	-5.1	6
							Cussons	1.5	6

## Sheet: Correlation&Regression
Correlations (Knowledge and demographics)									Correlations (global and demographics)								Correlations (global and demographics)-students excluded
		Knowledge_average	Age_coded	Gender_coded	Education_coded	Occupation_coded					Gender_coded	Age_coded	Education_coded	Occupation_coded	Global_average				Gender_coded	Age_coded	Education_coded	Occupation_coded	Global_average
Knowledge_average	Pearson Correlation	1	0.01	.136*	0.117	0.106			Gender_coded	Pearson Correlation	1	-0.01	0.053	-0.034	.161*		Gender_coded	Pearson Correlation	1	0.015	0.094	0.018	.216**
	Sig. (2-tailed)		0.888	0.045	0.087	0.122				Sig. (2-tailed)		0.88	0.438	0.623	0.018			Sig. (2-tailed)		0.842	0.219	0.812	0.004
	N	216	216	216	216	216				N	216	216	216	216	216			N	172	172	172	172	172
Age_coded	Pearson Correlation	0.01	1	-0.01	.149*	.174*			Age_coded	Pearson Correlation	-0.01	1	.149*	.174*	-0.03		Age_coded	Pearson Correlation	0.015	1	0.083	-0.129	-0.061
	Sig. (2-tailed)	0.888		0.88	0.028	0.01				Sig. (2-tailed)	0.88		0.028	0.01	0.661			Sig. (2-tailed)	0.842		0.28	0.093	0.429
	N	216	216	216	216	216				N	216	216	216	216	216			N	172	172	172	172	172
Gender_coded	Pearson Correlation	.136*	-0.01	1	0.053	-0.034			Education_coded	Pearson Correlation	0.053	.149*	1	.157*	-0.094		Education_coded	Pearson Correlation	0.094	0.083	1	.176*	-.164*
	Sig. (2-tailed)	0.045	0.88		0.438	0.623				Sig. (2-tailed)	0.438	0.028		0.021	0.17			Sig. (2-tailed)	0.219	0.28		0.021	0.032
	N	216	216	216	216	216				N	216	216	216	216	216			N	172	172	172	172	172
Education_coded	Pearson Correlation	0.117	.149*	0.053	1	.157*			Occupation_coded	Pearson Correlation	-0.034	.174*	.157*	1	.142*		Occupation_coded	Pearson Correlation	0.018	-0.129	.176*	1	.159*
	Sig. (2-tailed)	0.087	0.028	0.438		0.021				Sig. (2-tailed)	0.623	0.01	0.021		0.037			Sig. (2-tailed)	0.812	0.093	0.021		0.038
	N	216	216	216	216	216				N	216	216	216	216	216			N	172	172	172	172	172
Occupation_coded	Pearson Correlation	0.106	.174*	-0.034	.157*	1			Global_average	Pearson Correlation	.161*	-0.03	-0.094	.142*	1		Global_average	Pearson Correlation	.216**	-0.061	-.164*	.159*	1
	Sig. (2-tailed)	0.122	0.01	0.623	0.021					Sig. (2-tailed)	0.018	0.661	0.17	0.037				Sig. (2-tailed)	0.004	0.429	0.032	0.038
	N	216	216	216	216	216				N	216	216	216	216	216			N	172	172	172	172	172
* Correlation is significant at the 0.05 level (2-tailed).									* Correlation is significant at the 0.05 level (2-tailed).								** Correlation is significant at the 0.01 level (2-tailed).
																	* Correlation is significant at the 0.05 level (2-tailed).
Note: Correlation should be at leats >.3
As seen, no correlation (or very very little) exists between Knowledge and Gender.
Correlation (Knowledge and Global evaluation)
		Knowledge_average	Age_coded
Knowledge_average	Pearson Correlation	1	0.455
	Sig. (2-tailed)		0					Finding: Correlation between knowledge and global evaluation exists, though it is not very strong. If knowledge about CSR policies increases, global evaluation about companies CSR activities increases.
	N	216	216
Global_average	Pearson Correlation	0.455	1
	Sig. (2-tailed)	0
	N	216	216
* Correlation is significant at the 0.01 level (2-tailed).
Total sample (n=216)
R Square
Model Summary
R	R Square	Adjusted R Square	Std. Error of the Estimate
0.2	0.04	0.022	2.74
Stat significance	ANOVA
	Sum of Squares	df	Mean Square	F	Sig.
Regression	65.975	4	16.494	2.191	0.071
Residual	1588.6	211	7.529
Total	1654.57	215
Coefficients
	Unstandardized Coefficients		Standardized Coefficients	t	Sig.		Finding: Being a female increases knowledge about CSR of .74 (or 74%)
	B	Std. Error	Beta
(Constant)	0.429	0.815		0.527	0.599		Surprisingly, the impact of education on knowledge is not significant. But after excluding students form the sample, it becomes significant (see below).
Gender_coded	0.744	0.374	0.134	1.987	0.048
Age_coded	-0.036	0.121	-0.021	-0.299	0.765
Education_coded	0.32	0.227	0.097	1.411	0.16
Occupation_coded	0.075	0.053	0.098	1.421	0.157
Students excluded (n=172)
R Square
Model Summary
R	R Square	Adjusted R Square	Std. Error of the Estimate
0.16	0.026	0.02	2.84
Stat significance	ANOVA
	Sum of Squares	df	Mean Square	F	Sig.
Regression	36.853	1	36.863	4.565	0.034
Residual	1372.51	170	8.074
Total	1409.36	171
Coefficients
	Unstandardized Coefficients		Standardized Coefficients	t	Sig.
	B	Std. Error	Beta				Finding: As education increases of 1 unit, knowledge about CSR polciies increases of .557 (or 55.7%)
(Constant)	1.593	0.531		2.998	0.003
Education_coded	0.557	0.261	0.162	2.136	0.034
	Global evaluation	# of policies/actions
Apple	-18.9	28
BAT	-5.1	39
BP	-20.4	29
Cussons	1.5	40
Dole	-17.6	35
Dominos	-7.3	15
Kellogg’s	9.6	15
LG	2.8	61
McDonalds	48.7	35
Toyota	8.8	14
Unilever	-1	45
Westpac	37.7	20
Z	49.9	18
Correlation (Global evaluation_recoded and policies_recoded)
		Global evaluation	Number of policies
Global evaluation	Pearson Correlation	1	-0.177
	Sig. (2-tailed)		0.562
	N	13	13		Finding: No correlation between global evaluation and number of policies exists.
Number of policies	Pearson Correlation	-0.177	1
	Sig. (2-tailed)	0.562
	N	13	13
* Correlation is significant at the 0.01 level (2-tailed).
Global regressed against demographics (students excluded).
Coefficientsa
Model		Unstandardized Coefficients		Standardized Coefficients	t	Sig.
		B	Std. Error	Beta
1	(Constant)	-1.025	0.832		-1.232	0.22
	Gender_coded	1.11	0.347	0.233	3.195	0.002
	Age_coded	-0.034	0.115	-0.022	-0.296	0.768
	Education_coded	-0.623	0.214	-0.218	-2.917	0.004
	Occupation_coded	0.136	0.053	0.19	2.542	0.012
a Dependent Variable: Global_average

## Sheet: Corrs for H1
Total knowledge			Global	Environment	Employment	Suppliers	Community	Smoking prev	Marketing	Safety	Animal ethics	Food ethics
McDonalds	245.8		48.7	21.3	31.8	40.2	85.5	-	-	-	-	67
Z	90		49.9	14.5	5.2	-	70.3	-	-	-	-	-
Westpac	72.3		37.7	5.5	4.3	0.2	62.3	-	-	-	-	-
Kellogg’s	41.7		9.6	3.7	1.5	-	8.3	-	-	-	-	28.2
Toyota	18.2		8.8	18.2	-	-	-	-	-	-	-	-
Dominos	19.1		-7.3	11.7	-	0.2	-	-	-	-	-	7.2
BP	31.8		-20.4	17.8	0	3.5	10.5	-	-	-	-	-
Apple	26.8		-18.9	16.2	6.8	3.8	-	-	-	-	-	-
Dole	8.3		-17.6	4.8	-	-	3.5	-	-	-	-	-
LG	11.2		2.8	5.7	2.3	1.2	2	-	-	-	-	-		Correlations between global evaluation and (i) smoking prevention, (ii) marketing, (iii) safety and (iv) animal ethics cannot be computed
Cussons	4.1		1.5	2.3	1.3	0.2	0	-	-	0	0.3	-
Unilever	0.3		-1	0.3	0	0	0	-	-	-	-	0
BAT	0		-5.1	0	0	0	0	0	0	-	-	-
Environment					Employment					Suppliers					Community					Food ethics
Correlations					Correlations					Correlations					Correlations					Correlations
		Global_evaluation	Envir_know				Global	Employment_know				Global	Suppliers_know				Global	Community_know				Global	FoodEthics
Global_evaluation	Pearson Correlation	1	0.236		Global	Pearson Correlation	1	0.582		Global	Pearson Correlation	1	0.65		Global	Pearson Correlation	1	.916**		Global	Pearson Correlation	1	.971*
	Sig. (2-tailed)		0.438			Sig. (2-tailed)		0.078			Sig. (2-tailed)		0.058			Sig. (2-tailed)		0			Sig. (2-tailed)		0.029
	N	13	13			N	10	10			N	9	9			N	10	10			N	4	4
Envir_know	Pearson Correlation	0.236	1		Employment_know	Pearson Correlation	0.582	1		Suppliers_know	Pearson Correlation	0.65	1		Community_know	Pearson Correlation	.916**	1		FoodEthics	Pearson Correlation	.971*	1
	Sig. (2-tailed)	0.438				Sig. (2-tailed)	0.078				Sig. (2-tailed)	0.058				Sig. (2-tailed)	0				Sig. (2-tailed)	0.029
	N	13	13			N	10	10			N	9	9			N	10	10			N	4	4
															** Correlation is significant at the 0.01 level (2-tailed).					* Correlation is significant at the 0.05 level (2-tailed).
Environment					Employment					Suppliers					Community					Food ethics
Correlations					Correlations					Correlations					Correlations					Correlations
		Global_evaluation	Envir_know				Global	Employment_know				Global	Suppliers_know				Global	Community_know				Global	FoodEthics
Global_evaluation	Pearson Correlation	1	0.236		Global	Pearson Correlation	1	.582*		Global	Pearson Correlation	1	.650*		Global	Pearson Correlation	1	.916**		Global	Pearson Correlation	1	.971*
	Sig. (1-tailed)		0.219			Sig. (1-tailed)		0.039			Sig. (1-tailed)		0.029			Sig. (1-tailed)		0			Sig. (1-tailed)		0.015
	N	13	13			N	10	10			N	9	9			N	10	10			N	4	4
Envir_know	Pearson Correlation	0.236	1		Employment_know	Pearson Correlation	.582*	1		Suppliers_know	Pearson Correlation	.650*	1		Community_know	Pearson Correlation	.916**	1		FoodEthics	Pearson Correlation	.971*	1
	Sig. (1-tailed)	0.219				Sig. (1-tailed)	0.039				Sig. (1-tailed)	0.029				Sig. (1-tailed)	0				Sig. (1-tailed)	0.015
	N	13	13			N	10	10			N	9	9			N	10	10			N	4	4
					* Correlation is significant at the 0.05 level (1-tailed).					* Correlation is significant at the 0.05 level (1-tailed).					** Correlation is significant at the 0.01 level (1-tailed).					* Correlation is significant at the 0.05 level (1-tailed).

## Sheet: Demographics
Gender	Frequency	%
Males	106	49.0741
Females	110	50.9259
Total	216	100
Age	Frequency	%
18-25	62	28.7037
26-35	35	16.2037
36-45	35	16.2037
46-55	47	21.7593
56-65	25	11.5741
Over 65	12	5.55556
Total	216	100
Education	Frequency	%
Graduated High School	97	44.9074
Bachelor Degree of Equivalent	57	26.3889
Postgraduate Degree of Equivalent	62	28.7037
Total	216	100
Occupation	Frequency	%
Unemployed	13	6.01852
Retired	11	5.09259
Student	44	20.3704
Labourer	6	2.77778
Sales Worker	4	1.85185
Clerical and Administration Worker	10	4.62963
Community and Personal Service Worker	7	3.24074
Technician and Trades Worker	10	4.62963
Professional	53	24.537
Manager	15	6.94444
Self-Employed	15	6.94444
Other	28	12.963
Total	216	100

## Sheet: Merged_Gender
			Legend:	Scoring against knowledge			Global evaluation
	MALES
	Scorer 1
	Apple						BAT												BP								Cussons												Dole				Dominos						Kellogs
ID	Environment	Environment	Employment	Employment	Suppliers	Suppliers	Environment	Environment	Employment	Employment	Community	Community	Suppliers	Suppliers	Smoking prevention	Smoking Prevention	Marketing	Marketing	Environment	Environment	Employment	Employment	Community	Community	Suppliers	Suppliers	Environment	Environment	Employment	Employment	Community	Community	Suppliers	Suppliers	Safety	Safety	Animal Ethics	Animal Ethics	Environment	Environment	Community	Community	Environment	Environment	Suppliers	Suppliers	Food Ethics	Food Ethics	Environment
1
3																																								-1
9						-1														-1																										-1
12
15
21
23
24				-1		-1														-1			1																	-1		-1		-1				1
31		-1		-1		-1														-1																												-1
34
35		-1		-1		-1														-1																								-1				-1
38				1		-1														-1
41
43																				-1																				-1
44
45																			2	1
47																																											2
48						-1
52		-1				-1														-1																						-1						-1
53																																										-1
57				1																																								1
58	1	1
59				-1		-1													1	-1
60																																												-1
61																							2																				2
62																								-1																								-1
66
68
69		1				1														1				1															1	1				1			1	1
70	1	1				-1																																								-1		-1
72
73
74
78	2	1
82																																										1
84																				-1																							2	1				1
85
87
88						-1													2	1																												-1
91		-1		1		-1														-1					2	1														-1		-1	1	-1
95								-1				-1								-1																				-1		-1						-1
97
99
102
103
105		-1																		-1				1																								-1
106
108
112	1	1				-1													1	1			1	1																		-1
114	2	1																																														-1
120
123		1																																						1		1						-1
124	1	1
126
127																			1	1
128																			1																												1	1
130
131					1	-1														1
132																				-1
133				-1																																						-1
134																																																-1
136																				-1
137				-1
139						-1													1	-1																						1
141																				-1																												-1
142																				-1
143
145
146				1		1
147
150	1	1		-1																-1				-1
151						-1														-1																												-1
153
154
157
159		-1		-1		-1														-1																						-1						1
160																				1
162																							1	1																			2	1
163																				-1				-1
164																																																-1
166
167
169																																																1
171
172
175						-1														-1
180				1																-1			1	-1
184
185						-1														-1																												-1
186																			1	-1																						-1
187
188						-1													1	1			1	1																-1
189
190
194																				-1																												-1
195																				-1				-1																								-1
197		-1		-1		-1														-1				-1		-1														-1
198																				-1
199
203																				-1			1	1
205
206				-1																-1				-1
207				-1																-1
210																				-1
213
216						-1														-1			1	-1																-1		-1
ID	Environment	Environment	Employment	Employment	Suppliers	Suppliers	Environment	Environment	Employment	Employment	Community	Community	Suppliers	Suppliers	Smoking prevention	Smoking Prevention	Marketing	Marketing	Environment	Environment	Employment	Employment	Community	Community	Suppliers	Suppliers	Environment	Environment	Employment	Employment	Community	Community	Suppliers	Suppliers	Safety	Safety	Animal Ethics	Animal Ethics	Environment	Environment	Community	Community	Environment	Environment	Suppliers	Suppliers	Food Ethics	Food Ethics	Environment
sum	9	2	0	-6	1	-19	0	-1	0	0	0	-1	0	0	0	0	0	0	11	-26	0	0	9	-2	2	0	0	0	0	0	0	0	0	0	0	0	0	0	1	-6	0	-7	9	0	0	-2	2	-11	0
total sum/#scorers	10.3333	-1.16667	2	-8.83333	2.66667	-10.1667	0	-0.5	0	-0.166667	0	-1	0	0	0	-0.833333	0	-0.333333	7	-15	0	0	6.16667	4	1.66667	-0.166667	0	0	0	0	0	0	0	0	0	0	0	0	2.16667	-4.66667	1.33333	-6.83333	5	0.833333	0.166667	-0.5	1	-6.5	0.666667
			Legend:	Scoring against knowledge			Global evaluation
	FEMALES
	Scorer 1
	Apple						BAT												BP								Cussons												Dole				Dominos						Kellogs
ID	Environment	Environment	Employment	Employment	Suppliers	Suppliers	Environment	Environment	Employment	Employment	Community	Community	Suppliers	Suppliers	Smoking prevention	Smoking Prevention	Marketing	Marketing	Environment	Environment	Employment	Employment	Community	Community	Suppliers	Suppliers	Environment	Environment	Employment	Employment	Community	Community	Suppliers	Suppliers	Safety	Safety	Animal Ethics	Animal Ethics	Environment	Environment	Community	Community	Environment	Environment	Suppliers	Suppliers	Food Ethics	Food Ethics	Environment
2																				-1
4		1
5				-1															1	-1		-1																				-1						-1
6						-1													2					1																1
7						-1																																		-1		-1
8
10
11																				-1
13
14																			1	1
16				1
17																																										-1
18
19
20																								-1																				1				-1
22				1															1	1
25						-1														-1																						1						-1
26																																																1
27				-1		-1														-1																											2	1
28
29				-1		-1
30																			1	1
32																				-1
33				1															1	1																											1	1
36																																																-1
37																				-1				-1																								-1
39						-1
40				1
42												-1				-1
46				1																				-1
49																				1			1	1			1
50
51
54																				-1
55																																																1
56
63						-1
64						-1
65
67																			1	1			2
71				1		1														1						1																					2	1	1
75
76				1															1	1																							2				2	1
77		1		1																-1				-1
79
80																				-1																												-1
81
83
86																																																1
89																			1	-1				-1		-1		-1
90
92				1																-1				1																-1		-1					1	-1
93
94
96																				-1						-1																						1
98																				-1				-1																-1		-1						1
100
101																																																1
104
107		1																		-1				-1																		1		-1
109
110
111
113		1																																						1
115				1
116																							1	1																			2	1			1	1
117																							2	1																			2
118						-1														-1																						-1		-1
119				1
121
122		-1																		1				-1																		-1					1	1
125
129
135
138
140																								-1
144	1	1																					1	1																				-1
148
149
152		1
155																																																-1
156						-1														-1																								-1				-1
158																				-1							2	1	1	1																	1	-1
161																																											2	1
165																																																1
168		1				1																		1																								1
170																								1
173
174																			1
176
177
178				-1																-1
179
181																				1
182
183
191
192
193												-1								-1
196
200
201
202
204
208																																											1	1
209																																																-1
211																				-1																						1						-1
212
214
215																																																1
ID	Environment	Environment	Employment	Employment	Suppliers	Suppliers	Environment	Environment	Employment	Employment	Community	Community	Suppliers	Suppliers	Smoking prevention	Smoking Prevention	Marketing	Marketing	Environment	Environment	Employment	Employment	Community	Community	Suppliers	Suppliers	Environment	Environment	Employment	Employment	Community	Community	Suppliers	Suppliers	Safety	Safety	Animal Ethics	Animal Ethics	Environment	Environment	Community	Community	Environment	Environment	Suppliers	Suppliers	Food Ethics	Food Ethics	Environment
sum	1	6	0	7	0	-8	0	0	0	0	0	-2	0	0	0	-1	0	0	11	-11	0	-1	7	-1	0	-1	3	0	1	1	0	0	0	0	0	0	0	0	0	-1	0	-4	9	0	0	0	11	3	1
total sum/#scorers	5.83333	3	4.83333	3.66667	1.16667	-5.33333	0	0	0	0	0	-0.666667	0	-0.166667	0	-0.833333	0	-0.5	10.8333	-9	0	-0.666667	4.33333	0.5	1.83333	0	2.33333	0.5	1.33333	1	0	0	0.166667	0	0	0	0.333333	0	2.66667	-2.16667	2.16667	-4	6.66667	-0.666667	0	0	6.16667	-0.5	3
[truncated: 565 more columns]

## Sheet: Results_gender specific
9 CSR policies identified in total															Company	Number of policies				Number of all policies across companies				50
13 Companies															Apple	3
MALES ONLY						FEMALES ONLY									BAT	6
Respondents' knowledge about companies' policy towards environment						Respondents' knowledge about companies' policy towards environment									BP	4				Respondents' knowledge about policies (individuals)
	Knowledge	Global					Knowledge	Global							Cussons	6					MALES		FEMALES				MALES		FEMALES
Apple	10.3	-1.2				Apple	5.8	3							Dole	2					Frequency	%	Frequency	%			Frequency	%	Frequency	%
BAT	0	-0.5				BAT	0	0							Dominos	3				Very low (0-3)	76	71.6981	66	60		No knowledge	25	23.6	16	14.6
BP	7	-15				BP	10.8	-9							Kellogs	4				Low (3.1-6)	18	16.9811	29	26.3636
Cussons	0	0				Cussons	2.3	0.5							LG	4				Moderate (6.1-9)	11	10.3774	10	9.09091
Dole	2.2	-4.7				Dole	2.7	-2.2							McDonalds	5				High (over 9)	1	0.943396	5	4.54545
Dominos	5	0.8				Dominos	6.7	-0.7							Toyota	1				Total	106	100	110	100
Kellogs	0.7	0.2				Kellogs	3	2.2							Unilever	5
LG	2	-0.8				LG	3.7	1.3							Westpac	4				Finding: Females have higher knowledge about CSR policies compared to males
McDonalds	10.3	1.8				McDonalds	11	0.8							Z	3
Toyota	11.2	4.8				Toyota	7	4
Unilever	0.2	0.7				Unilever	0.2	-1.7							Average knowledge about policies-males vs females					Respondents' global evaluation (individuals)
Westpac	1.5	1.3				Westpac	4	3.2							Policy	Knowledge					MALES		FEMALES
Z	6	1.5				Z	8.5	4.2								Males(N=106)	Females(N=110)				Frequency	%	Frequency	%
sum knowledge/#companies	4.33846					sum knowledge/#companies	5.05385								Food ethics	9.1	16.5			Negative (below 0)	35	33.0189	25	22.7273
															Community	10.4	13.8			Neutral (0)	19	17.9245	17	15.4545
															Environment	4.3	5.1			Positive (over 0)	52	49.0566	68	61.8182
Respondents' knowledge about companies' policy towards employment						Respondents' knowledge about companies' policy towards employment									Suppliers	2.8	2.7			Total	106	100	110	100
	Knowledge	Global					Knowledge	Global							Employment	1.7	3.7
Apple	2	-8.8				Apple	4.8	3.7							Animal ethics	0	0.3			Finding: Females have more positive global evaluation of companies' CSR policies compared to males
BAT	0	-0.2				BAT	0	0							Smoking prevention	0	0
BP	0	0				BP	0	-0.7							Marketing	0	0
Cussons	0	0				Cussons	1.3	1							Safety	0	0
Kellogs	0	-1.7				Kellogs	1.5	1
LG	0	-1.5				LG	2.3	1.8
McDonalds	10.2	-1.5				McDonalds	21.7	7.3
Unilever	0	0				Unilever	0	0
Westpac	1.8	2				Westpac	2.5	3								Total		males		females
Z	2.5	3.5				Z	2.7	3.7								mean	se
sum knowledge/#companies	1.65					sum knowledge/#companies	3.68								Knowledge	2.57	2.77	2.18	2.47	2.94	3
Respondents' knowledge about companies' policy towards suppliers						Respondents' knowledge about companies' policy towards suppliers
	Knowledge	Global					Knowledge	Global
Apple	2.7	-10.2				Apple	1.2	-5.3
BAT	0	0				BAT	0	-0.2
BP	1.7	-0.2				BP	1.8	0
Cussons	0	0				Cussons	0.2	0
Dominos	0.2	-0.5				Dominos	0	0
LG	1	1				LG	0.2	-0.3
McDonalds	19.2	6.2				McDonalds	21	7.3
Unilever	0	0				Unilever	0	0
Westpac	0.2	0				Westpac	0	0
sum knowledge/#companies	2.77778					sum knowledge/#companies	2.71111
Respondents' knowledge about companies' policy towards community						Respondents' knowledge about companies' policy towards community
	Knowledge	Global					Knowledge	Global
BAT	0	-1				BAT	0	-0.7
BP	6.2	4				BP	4.3	0.5
Cussons	0	0				Cussons	0	0
Dole	1.3	-6.8				Dole	2.2	-4
Kellogs	3.5	1				Kellogs	4.8	3.5
LG	1.5	1.2				LG	0.5	0.2
McDonalds	38.8	17				McDonalds	46.7	18.2
Unilever	0	0				Unilever	0	0
Westpac	26	11.8				Westpac	36.3	16.3
Z	26.8	13.8				Z	43.5	23.2
sum knowledge/#companies	10.41					sum knowledge/#companies	13.83
Respondents' knowledge about companies' policy towards smoking prevention						Respondents' knowledge about companies' policy towards smoking prevention
	Knowledge	Global					Knowledge	Global
BAT	0	-0.8				BAT	0	-0.8
Respondents' knowledge about companies' policy towards marketing						Respondents' knowledge about companies' policy towards marketing
	Knowledge	Global					Knowledge	Global
BAT	0	-0.3				BAT	0	-0.5
Respondents' knowledge about companies' policy towards safety						Respondents' knowledge about companies' policy towards safety
	Knowledge	Global					Knowledge	Global
Cussons	0	0				Cussons	0	0
Respondents' knowledge about companies' policy towards animal ethics						Respondents' knowledge about companies' policy towards animal ethics
	Knowledge	Global					Knowledge	Global
Cussons	0	0				Cussons	0.3	0
Respondents' knowledge about companies' policy towards food ethics						Respondents' knowledge about companies' policy towards food ethics
	Knowledge	Global					Knowledge	Global
Dominos	1	-6.5				Dominos	6.2	-0.5
Kellogs	11.5	3.2				Kellogs	16.7	0.2
McDonalds	23.8	-10.7				McDonalds	43.2	2.2
Unilever	0	0				Unilever	0	0
sum knowledge/#companies	9.075					sum knowledge/#companies	16.525
Companies' global evaluation - average (sum global/#policies)-MALES						Companies' global evaluation - average (sum global/#policies)-FEMALES
Company		Global evaluation				Company		Global evaluation
Z		6.26667				Z		10.3667
McDonalds		2.56				McDonalds		7.16
Westpac		3.775				Westpac		5.625
Toyota		8.8				Toyota		8.8
Kellogs		0.675				Kellogs		1.725
LG		-0.025				LG		0.75
Cussons		0				Cussons		0.25
Unilever		0.14				Unilever		-0.34
BAT		-0.466667				BAT		-0.366667
Dominos		-2.06667				Dominos		-0.4
BP		-2.8				BP		-2.3
Apple		-6.73333				Apple		0.466667
Dole		-5.75				Dole		-3.1

## Sheet: z-test
Knowledge			Global
females	males		females	males
1.7	0		0	0
1	3.5		0.5	1.3
9	1.3		-1.2	-1.8
10.8	0		4.5	0
6	0		1.7	0.3					Knowledge					Global
2.8	0		1.3	0
0	0		0.5	0					p=.05					p=.01
0	8		-1	-6
0.2	6.3		0	0					z-Test: Two Sample for Means					z-Test: Two Sample for Means
4.5	2		5	0.5
0.8	6.2		0.3	-8.5						Females	Males				Females	Males
2.7	1.2		-1.7	0.8					Mean	2.93818	2.18302			Mean	0.777273	0.0283019
4.8	6.2		5.3	3.2					Known Variance	9.003	6.119			Known Variance	4.848	5.831
0.5	0		1	-2.2					Observations	110	106			Observations	110	106
1.8	3.3		-0.3	2					Hypothesized Mean Difference	0				Hypothesized Mean Difference	0
7.5	5.5		3.5	1					z	2.02135				z	2.3794
3.3	7.3		-1.2	3.5					P(Z<=z) one-tail	0.0216217				P(Z<=z) one-tail	0.00867046
3.7	2.3		3.7	-0.7					z Critical one-tail	1.64485				z Critical one-tail	2.32635
4.7	0.7		-2.2	-4.7					P(Z<=z) two-tail	0.0432434				P(Z<=z) two-tail	0.0173409
0.3	0.5		0.3	-1.3					z Critical two-tail	1.95996				z Critical two-tail	2.57583
1.2	3.3		-5	1.5
5.8	2		3.8	1
4.2	5.5		0.8	-0.5					p=.01
10.2	0		5.7	-0.7
3.5	4.5		0.2	1.5					z-Test: Two Sample for Means
5.8	3.3		1.5	0.3
3.7	0		1.3	-0.2						females	males
5	4		4.5	0.5					Mean	2.93818	2.18302
0	5.8		-1.2	8					Known Variance	9.003	6.119
0.8	11		0.7	5.5					Observations	110	106
3.3	0		3.3	0					Hypothesized Mean Difference	0
3	3		0.7	1.5					z	2.02135
0	0.3		0	0.3					P(Z<=z) one-tail	0.0216217
2.8	0.8		0.8	0.5					z Critical one-tail	2.32635
0	2.7		0.5	-0.8					P(Z<=z) two-tail	0.0432434
0	4.3		0	2.3					z Critical two-tail	2.57583
0	0.7		-1.2	0.3
10.2	5.7		5	2.7
5.5	6.3		1	2
7.2	7.2		3.3	-7
9	0.2		6.5	-6.5
1.5	0		0.3	0
5	3.5		0.7	2.5
3	1.8		2.7	-0.5
2	3.3		-0.3	0.8
0.7	2.5		-1.7	-1.5
2	0		2.2	0
1.8	0		1	0
5	7.5		-0.7	4.7
4.8	1.2		-3.8	-0.2
0.8	0		0	0
7.3	5		0.7	2.8
1.7	1		-1.3	3.2
0	0.2		0	0.7
5.2	0.5		0	0.7
1.2	2.2		-4.2	1.7
0.3	2.7		0	0.8
4.3	0.5		3.2	0.2
1.3	1.8		-0.2	-0.5
11.8	0.5		4.7	-1.7
0	1		0	0
0.3	1.7		0	0.2
0.2	0.2		0.3	-1
1.2	5.3		1	2.2
0.2	0.7		0.3	-0.2
9	2.8		6.2	1
8.5	0		4.2	0.2
5.3	0		-5.3	0
3.5	0.8		3	2
0.3	1.2		0.3	0.2
5.2	2		3.2	-3.8
0	0.5		0	-1.5
1.3	1.3		0.5	0.2
3.2	1.3		1.3	0.7
0.3	0		-1.5	0
1.7	5		-1.8	-3.5
4.7	1		1.3	1.5
0	6.5		0.2	3
0.5	0.2		0	-1.2
0.7	0.5		0.7	-2.7
0.5	0		-1.7	0
2	0		-4.5	0
8.8	1.3		4.5	1.7
5	0.2		2	0.2
5.8	0		2.5	0
0.5	0.2		1	-3
0.2	8		0.8	4.2
0	1.8		0	-0.7
2.2	1.2		1	-3.2
2.3	4.8		1.3	0.8
0.2	0		0.7	0
1	0.8		0.3	-0.5
0.3	0		-0.8	1.3
1	0.5		-0.3	0.2
3.2	0.2		1.8	-2.2
0	1.8		0	-0.7
1.2	1		0.5	-5.2
0	2.7		0	0.2
0.2	0		-2.7	0
0	7.5		0	4.7
0.3	0		0.2	0
2.7	1.5		1.8	-2.8
3.2	2.5		0.7	0.5
9.5	0		2.3	-1
6.5	0		0.5	0.2
1.3	4.3		-0.3	-2.3
7.7			1.7
3.7			2.3
0			0
0.8			0.5

## Sheet: Coding
Coding in SPSS
Knowledge_coded
0-3	1
3.1-6	2
6.1-9	3
Over 9	4
Global_coded
Negative (below 0)	1
Neutral (0)	2
Positive (over 0)	3
Global_recoded
from -20.4 to -10	1
from -9.9 to 0	2
from 0.1 to 10	3
from 10.1 to 50	4
policies_recoded
from 14 to 20	1
from 21 to 30	2
from 31 to 40	3
from 41 to 50	4
51 and over	5
