# Supplementary material for: Disentangling Consumers’ CSR Knowledge Types and Effects
Source: MDPI journal article supplement (doi:10.3390/su141911946), 2022-09-22
Supplement: s1 [file s1 › Training Example.xlsx]

## Sheet: Sheet1
Participant No.	Knowledge of Policy	General Comments	Environment	Environment	Suppliers	Suppliers
1	They are not a bad company for ethics, I think. They do a lot of good work, but I wonder whether they are just using their ethical policy to sell us more of their junk. At least they are working on offsetting their carbon emissions. I don’t know much about their suppliers, but I guess they would at least be better than most on making sure their suppliers are ethical.
2	They make shoes I believe.	I think they are a good company. I like their products.
3	They are pretty dodgy, I have heard. They claim all this ethical stuff, but it is all a smokescreen. They are a bad company. They claim they are carbon neutral due to offsets, but I read that this is a lie to help them pretend they are taking action on global warming. They have also been found to use child labour, so now claim they are doing ethical policies.
4
5
6
7
8
9
10
11
12
13
14
15
16
17
18
19
20
21
22
23
24
25
26
27
28
29
30
31
32
33
34
35
36
37
38
39
40
41
42
43
44
45
46
47
48
49
50
51
52
53
54
55
56
57
58
59
60
61
62
63
64
65
66
67
68
69
70
71
72
73
74
75
76
77
78
79
80
81
82
83
84
85
86
87
88
89
90
91
92
93
94
95
96
97
98
99
100
101
102
103
104
105
106
107
108
109
110
111
112
113
114
115
116
117
118
119
120
121
122
123
124
125
126
127
128
129
130
131
132
133
134
135
136
137
138
139
140
141
142
143
144
145
146
147
148
149
150
151
152
153
154
155
156
157
158
159
160
161
162
163
164
165
166
167
168
169
170
171
172
173
174
175
176
177
178
179
180
181
182
183
184
185
186
187
188
189
190
191
192
193
194
195
196
197
198
199
200
201
202
203
204
205
206
207
208
209
210
211
212
213
214
215
216

## Sheet: Sheet2
Environment	Employment	Community	Suppliers	Food Ethics	Marketing	Global Evaluation
